# Supplementary material for: Cascade of neural processing orchestrates cognitive control in human frontal cortex
Source: eLife. 2016 Feb 18;5:e12352. doi: 10.7554/eLife.12352 (PMC4811762; doi:10.7554/eLife.12352)
Supplement: Supplementary file 1. — DOI: http://dx.doi.org/10.7554/eLife.12352.021 [file elife-12352-supp1.xlsx]

## Sheet: Table S1
	Supplementary File 1
	Subject #	Subject ID	Age	Gender	# Electrodes	# Trials	Trial length (s)	Language
	1	j00018	42	F	87	202	3	English
	2	j00023	27	M	132	414	2	English
	3	j00024	30	M	64	337	2	English
	4	j00025	32	F	152	439	2	English
	5	j00029	50	M	101	470	2	English
	6	j00031	41	F	87	213	2	English
	7	j00033	39	M	120	470	2	English
	8	m00098	45	F	112	375	2	English
	9	m00100	10	F	122	461	2	English
	10	m00103	10	F	104	431	2	English
	11	tw0005	30	M	64	360	2	Mandarin
	12	tw0007	34	M	40	364	2	Mandarin
	13	tw0009	19	M	64	452	2	Mandarin
	14	tw0012	13	M	84	371	2	Mandarin
	15	tw0014	24	F	64	470	2	Mandarin
	Information about each of the 15 subjects that participated in this study
