# Supplementary material for: Cascade of neural processing orchestrates cognitive control in human frontal cortex
Source: eLife. 2016 Feb 18;5:e12352. doi: 10.7554/eLife.12352 (PMC4811762; doi:10.7554/eLife.12352)
Supplement: Supplementary file 2. — DOI: http://dx.doi.org/10.7554/eLife.12352.022 [file elife-12352-supp2.xlsx]

## Sheet: Table S2
Supplementary File 2
		Gamma-power, Stroop task		Gamma-power, Reading task
Subject #	Location	Congruent	Incongruent	Congruent	Incongruent
1	Superior Frontal Gyrus	1.85354	1.93558	1.87503	1.74428
1	Anterior Cingulate Cortex	3.12264	3.14036	2.86902	2.77255
1	Superior Frontal Gyrus	2.13664	2.53116	2.06254	2.11744
1	Anterior Cingulate Cortex	3.10118	3.44032	3.00782	2.82116
1	Anterior Cingulate Cortex	2.54729	3.19104	2.25489	2.3509
4	Orbital Gyrus	2.28878	2.26732	2.48958	2.30883
5	Frontomarginal Gyrus	1.86895	1.8045	2.25269	2.30445
5	Orbital Gyrus	2.33562	2.68156	2.13353	2.10517
5	Middle Frontal Gyrus	2.07337	2.21466	2.061	2.08816
5	Orbital Gyrus	2.66185	2.40647	2.59771	2.41689
5	Superior Frontal Gyrus	2.11408	1.87947	2.08306	1.99565
5	Superior Frontal Gyrus	2.33252	1.982	2.17765	2.09562
5	Middle Frontal Gyrus	2.15058	2.46551	2.09743	2.00026
5	Middle Frontal Gyrus	3.41604	3.28602	2.20976	2.21755
6	Superior Frontal Gyrus	2.01937	2.1808	-	-
6	Middle Frontal Gyrus	1.94012	2.18195	-	-
7	Frontomarginal Gyrus	1.7085	1.47901	1.96178	2.03181
7	Frontomarginal Gyrus	1.64228	1.76303	1.92199	2.00668
7	Frontomarginal Gyrus	1.67151	1.68753	1.82215	1.87709
7	Middle Frontal Gyrus	1.65562	1.82925	1.83463	1.87787
7	Middle Frontal Gyrus	1.87945	2.31955	1.79954	1.72115
7	Middle Frontal Gyrus	2.48954	2.6546	2.38732	2.44142
7	Middle Frontal Gyrus	2.77469	4.1402	2.10154	1.95686
7	Middle Frontal Gyrus	1.85949	2.44698	1.89139	1.92943
8	Middle Frontal Gyrus	2.27354	2.15068	2.2041	2.15442
8	Orbital Gyrus	2.45614	2.34335	2.21806	2.61371
9	Middle Frontal Gyrus	2.97283	3.04154	2.95791	2.85646
9	Middle Frontal Gyrus	2.32084	2.80015	2.31706	2.43404
9	Middle Frontal Gyrus	2.78917	2.64876	2.81802	2.73695
10	Orbital Gyrus	2.30315	2.64713	2.49634	2.25588
10	Middle Frontal Gyrus	3.49723	4.48839	4.27744	3.24181
11	Orbital Gyrus	2.00831	2.28604	2.18254	1.95154
11	Orbital Gyrus	1.90314	2.06916	2.08995	2.23123
11	Orbital Gyrus	2.14146	2.16912	1.98496	2.16084
11	Middle Frontal Gyrus	2.80671	2.98069	2.12023	2.12475
12	Middle Frontal Gyrus	2.25863	2.82406	2.1904	2.35269
13	Inferior Orbital Gyrus	2.00272	2.56064	2.17048	2.36531
13	Middle Frontal Gyrus	2.10521	2.58886	2.15193	2.17739
14	Middle Frontal Gyrus	2.29264	2.89108	2.13698	2.41478
15	Middle Frontal Gyrus	3.36483	4.52561	2.65868	2.739
15	Middle Frontal Gyrus	2.54788	2.74119	2.00179	2.01171
15	Middle Frontal Gyrus	7.29706	9.25703	5.00114	5.09045
15	Middle Frontal Gyrus	3.23353	4.87927	3.37466	3.24591
15	Middle Frontal Gyrus	4.0449	6.45207	3.10702	2.74005
15	Middle Frontal Gyrus	3.26798	3.60038	2.39042	2.54641
15	Inferior Orbital Gyrus	3.05682	3.21688	2.78176	2.76958
15	Anterior Cingulate Cortex	3.71684	4.34128	2.396	2.514
15	Superior Frontal Gyrus	3.36391	3.67333	2.30604	2.51011
15	Superior Frontal Gyrus	2.84424	4.05177	2.21613	1.97625
15	Superior Frontal Gyrus	1.95659	2.26622	1.88215	1.91952
15	Superior Frontal Gyrus	2.34357	2.49794	1.93609	2.09765
Information about each of the 51 electrodes that were modulated by conflict
