# Supplementary material for: Cascade of neural processing orchestrates cognitive control in human frontal cortex
Source: eLife. 2016 Feb 18;5:e12352. doi: 10.7554/eLife.12352 (PMC4811762; doi:10.7554/eLife.12352)
Supplement: Supplementary file 3. — DOI: http://dx.doi.org/10.7554/eLife.12352.023 [file elife-12352-supp3.xlsx]

## Sheet: Table S3
Supplementary File 3
	1	2	3	4	5	6	7	8	9	10	11	12	13	14	15	Total
Anterior Cingulate Cortex	3														1	4
Medial Frontal Cortex	2				2	1									4	9
Dorsolateral Prefrontal Cortex					3	1	5	1	3	1	1	1	1	1	6	24
Orbitofrontal Cortex				1	3		3	1		1	3		1		1	14
Total	5	0	0	1	8	2	8	2	3	2	4	1	2	1	12	51
Distribution of the 51 electrodes that were modulated by conflict across the four frontal cortex
areas and the 15 subjects in our study.
