# Supplementary material for: Cascade of neural processing orchestrates cognitive control in human frontal cortex
Source: eLife. 2016 Feb 18;5:e12352. doi: 10.7554/eLife.12352 (PMC4811762; doi:10.7554/eLife.12352)
Supplement: Supplementary file 4. — DOI: http://dx.doi.org/10.7554/eLife.12352.024 [file elife-12352-supp4.xlsx]

## Sheet: Sheet1
Cascade of neural processing orchestrates cognitive control in human frontal cortex
Tang H, Yu H, Chou C, Crone N, Madsen J, Anderson W, Kreiman G
Supplementary File 4
Description	Location	Effects tested	Statistical Test	n	definition	test statistic	p-value	d.f.	Effect Size
Performance (Task X Congruency)	Results, para 2	Task X Congruency	ANOVA	15	subjects	F = 22.87	p = 0.0004	1	0.12	Eta-squared
Performance (Stroop)	Results, para 2	C vs I	paired t-test	15	subjects	t = 4.9	p = 2.4e-04	14	1.9	Cohen's d
Performance (Reading)	Results, para 2	C vs I	paired t-test	14	subjects	t = 0.32	p = 0.76	13	0.12	Cohen's d
RT (Task x Congruency)	Results, para 2	Task X Congruency	ANOVA	15	subjects	F = 65.23	p = 2e-06	1	0.04	Eta-squared
RT (Stroop)	Results, para 2	C vs I	paired t-test	15	subjects	t = 8.96	p = 3.5e-07	14	3.42	Cohen's d
RT (Reading)	Results, para 2	C vs I	paired t-test	14	subjects	t = -2.6	p = 0.02	13	1.29	Cohen's d
RT (Previous X Current)	Results, para 2	Previous X Current	ANOVA	15	subjects	F = 19.46	p = 0.0006	1	0.02	Eta-squared
RT (cI vs iI)	Results, para 2	cI vs iI	paired t-test	14	subjects	t = 2.4	p = 0.03	13	0.88	Cohen's d
RT (iC vs. cC)	Results, para 2	iC vs cC	paired t-test	14	subjects	t = 4.6	p = 0.0004	13	1.7	Cohen's d
Gamma Power (C vs I, Stroop)	Results, para 5	C vs I	non-parametric ANOVA	150	trials	F = 36.6	p < 0.0001	149	N/A
Gamma Power (Task X Congruency)	Results, para 5	Task X Congruency	non-parametric ANOVA	160	trials	F = 13.5	p = 0.007	159	N/A
False Positive analysis (ACC)	Results, para 7	N/A	permutation test	10000	shuffles	n = 4	p = 0.007	N/A	4.1	s.d.
False Positive analysis (mFC)	Results, para 7	N/A	permutation test	10000	shuffles	n = 9	p = 0.0007	N/A	6.3	s.d.
False Positive analysis (dlPFC)	Results, para 7	N/A	permutation test	10000	shuffles	n = 24	p < 0.0001	N/A	14.9	s.d.
False Positive analysis (OFC)	Results, para 7	N/A	permutation test	10000	shuffles	n = 14	p < 0.0001	N/A	9.7	s.d.
Correlation of Gamma with RT	Fig. 2H	N/A	Pearson correlation	84	conflict trials	r = 0.25	p = 0.02	83	0.25	r
Gamma Power (Task X Congruency)	Fig. 4A	Task X Congruency	MLM, likelihood ratio test	51	electrodes	χ2=9.2	p = 0.002	1	0.06	f-squared
Gamma Power (C vs I, Stroop)	Fig. 4A	C vs I	MLM, likelihood ratio test	51	electrodes	χ2=19.7	p < 0.0001	1	0.48	f-squared
Gamma Power (C vs I, Reading)	Fig. 4A	C vs I	MLM, likelihood ratio test	51	electrodes	χ2=0.34	p = 0.56	1	0.007	f-squared
Gamma Power (Trial X Congruency)	Fig. 4D	Trial X Congruency	MLM, likelihood ratio test	51	electrodes	χ2=4.4	p = 0.03	1	0.03	f-squared
Gamma Power (cI vs iI, Stroop)	Fig. 4D	cI vs iI	MLM, likelihood ratio test	51	electrodes	χ2=11	p < 0.0001	1	0.25	f-squared
Gamma Power (cI vs iI, Reading)	Fig. 4D	cI vs iI	MLM, likelihood ratio test	51	electrodes	χ2=0.12	p = 0.72	1	0.002	f-squared
Gamma Power (Trial X Congruency)	Fig. 4E	Trial X Congruency	MLM, likelihood ratio test	51	electrodes	χ2=1.9	p = 0.17	1	0.01	f-squared
Gamma Power (iC vs cC Stroop)	Fig. 4E	iC vs cC	MLM, likelihood ratio test	51	electrodes	χ2=1.9	p = 0.16	1	0.002	f-squared
Gamma Power (iC vs cC Reading)	Fig. 4E	iC vs cC	MLM, likelihood ratio test	51	electrodes	χ2=1.8	p = 0.19	1	0.001	f-squared
Error vs Correction (ACC electrode)	Fig. 5B	Error vs Correction	sign-rank test	11	trials	signedrank=0	p = 0.001	10	1.76	Cohen's d
Error vs Correction (dlPFC electrode)	Fig. 5D	Error vs Correction	sign-rank test	10	trials	signedrank=0	p = 0.002	9	2.69	Cohen's d
Latency by Region	Fig. 6	N/A	permutation test	51	electrodes	F = 7.2	p = 0.01	50	3.5	s.d.
Latency (ACC-MFC)	Fig. 6	N/A	permutation test	51	electrodes	388 ms	p = 0.0012	50	2	s.d.
Latency (ACC-dlPFC)	Fig. 6	N/A	permutation test	51	electrodes	207 ms	p = 0.016	50	2.2	s.d.
Latency (dlPFC-OFC)	Fig. 6	N/A	permutation test	51	electrodes	319 ms	p = 0.009	50	2.3	s.d.
Effect size measures	Definition		Source
Cohen's d (repeated measures)	(m1-m2)/(pooled SD)/sqrt(1-r)		Cohen, J. (1988). Statistical power analysis for the behavioral sciences (2nd ed.). Hillsdale, NJ: Lawrence Earlbaum Associates.
Eta-squared	SS_between/SS_total		Pearson, K. (1911). On a correction needful in the case of the correlation ratio. Biometrika, 8, 254-256
f-squared	(R^2_model-R^2_null)/(1-R^2_model)		Cohen, J. (1988). Statistical power analysis for the behavioral sciences (2nd ed.). Hillsdale, NJ: Lawrence Earlbaum Associates.
s.d.	Standard deviation from null distribution
