# Supplementary figures and images for: Cascade of neural processing orchestrates cognitive control in human frontal cortex
Source: eLife journal article supplement (doi:10.7554/elife.12352), 2016-02-18

Figure 1-figure supplement 1

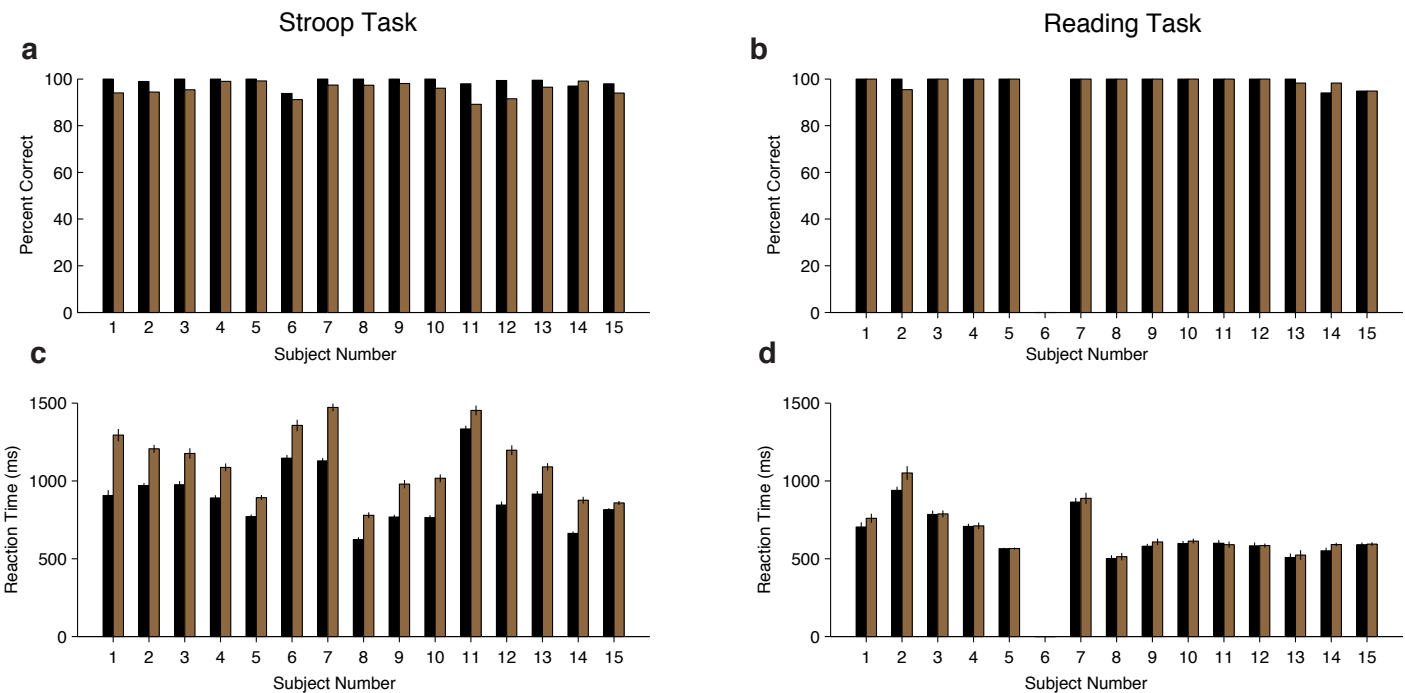

Supplement: supp [file elife-12352-supp-v1.zip]

**Figure 2-figure supplement 1**

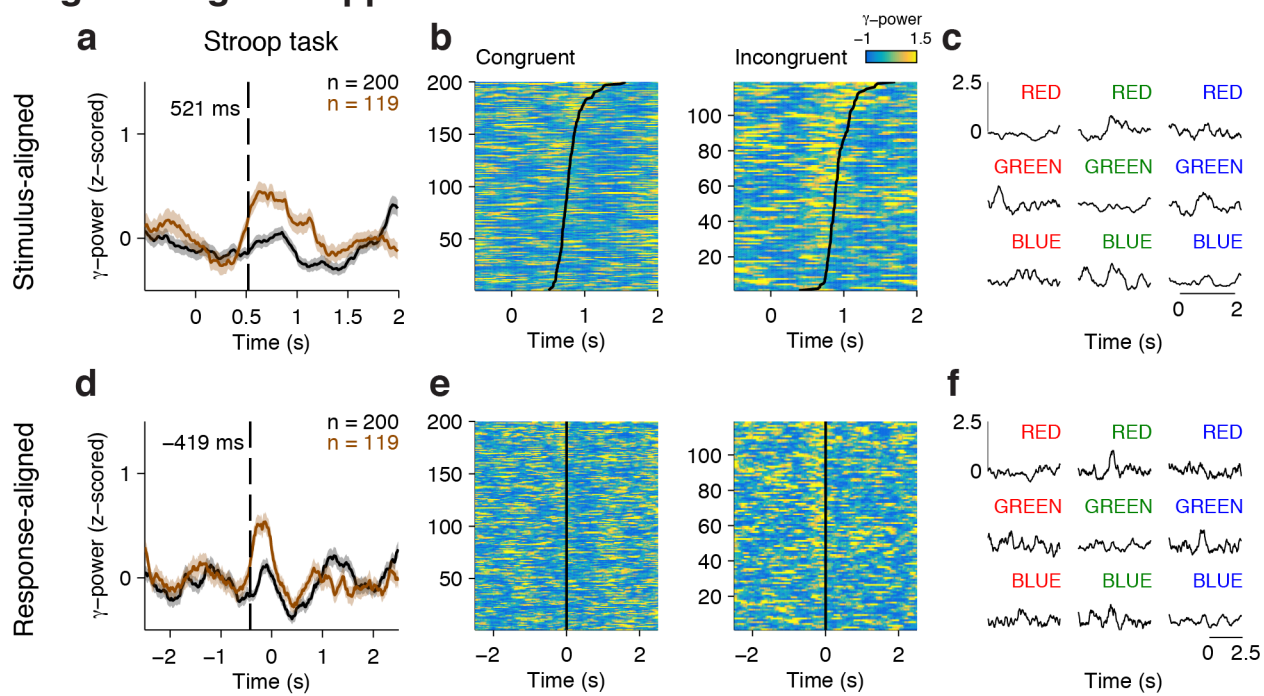

Tangetal\_F2S1.pdf

Created in: Adobe Illustrator CS6 (Macintosh)

Supplement: supp [file elife-12352-supp-v1.zip]

**Figure 4-figure supplement 1**

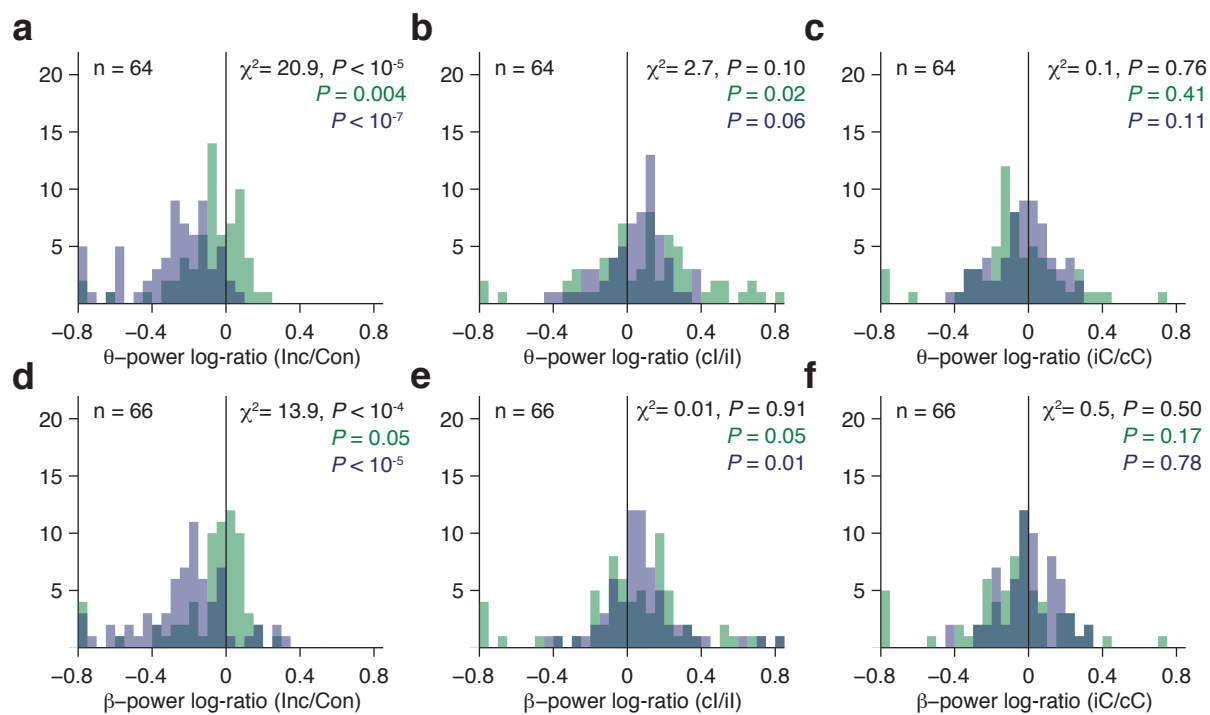

Tangetal\_F4S1.pdf

Created in: Adobe Illustrator CS6 (Macintosh)

Supplement: supp [file elife-12352-supp-v1.zip]

**Figure 4-figure supplement 3**

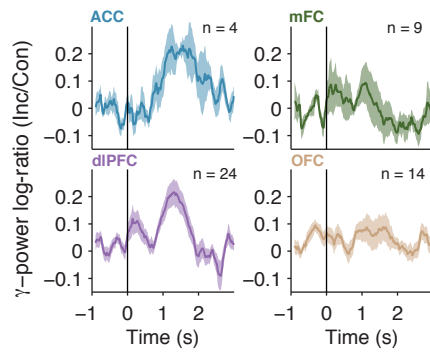

Tangetal\_F4S3.pdf

Created in: Adobe Illustrator CS6 (Macintosh)

Supplement: supp [file elife-12352-supp-v1.zip]

**Figure 4-figure supplement 2**

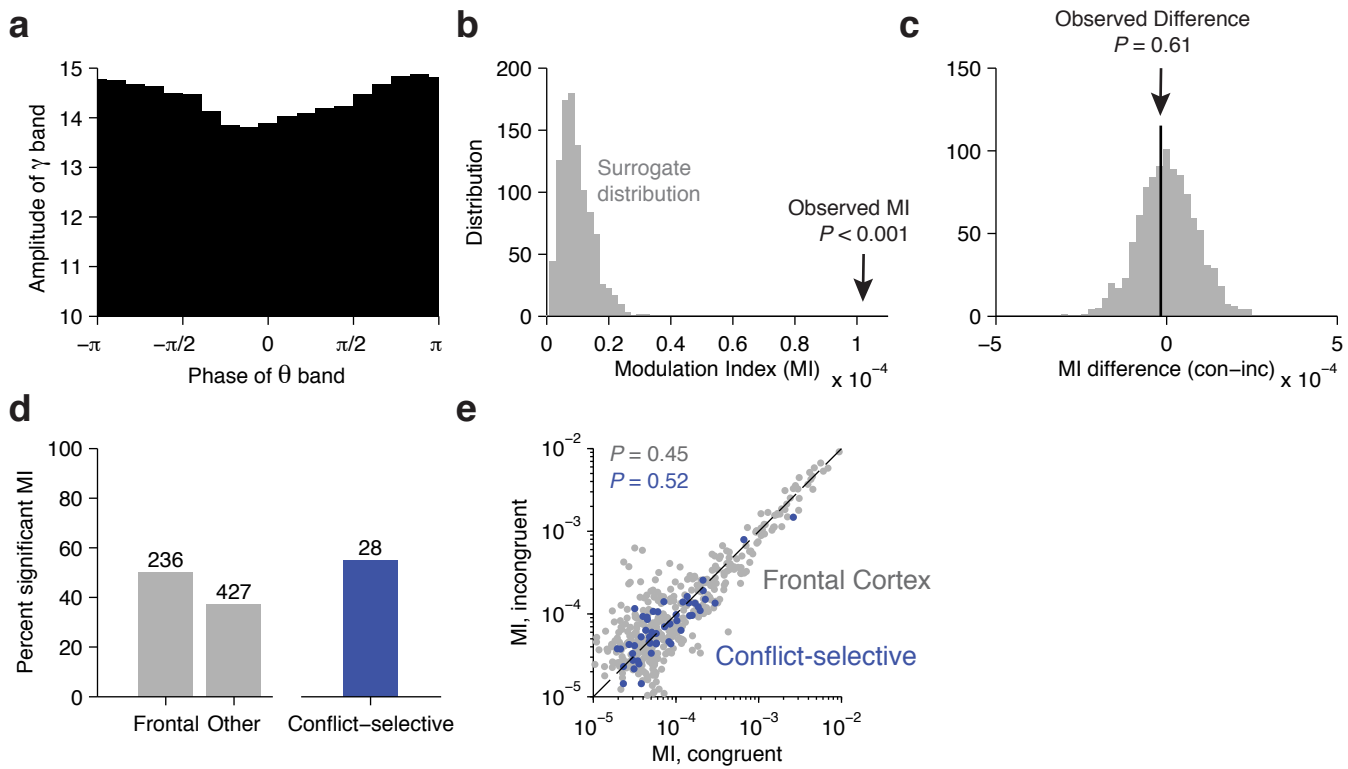

Tangetal\_F4S2.pdf

Created in: Adobe Illustrator CS6 (Macintosh)

Supplement: supp [file elife-12352-supp-v1.zip]

Figure 2-figure supplement 2

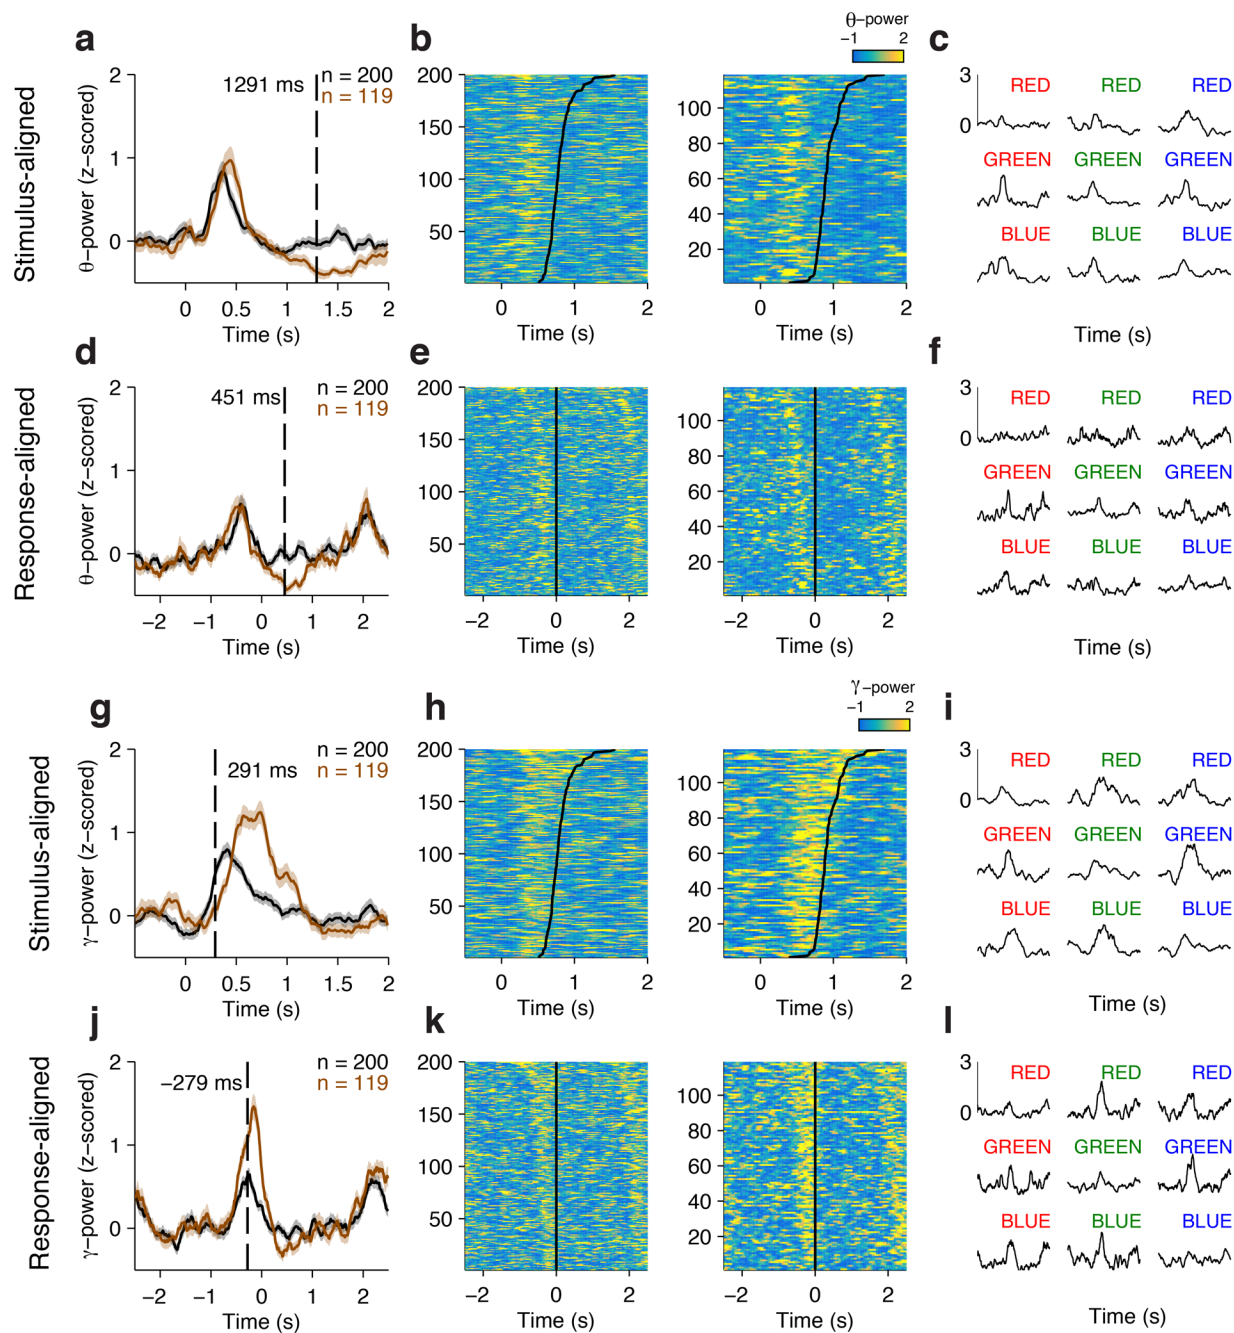

Supplement: supp [file elife-12352-supp-v1.zip]
